# Supplementary material
Source: Elsevier journal article supplement (https://comptes-rendus.academie-sciences.fr/biologies/article/10.1016/j.crvi.2012.11.005/file/attach/mmc1.pdf)
Supplement: mmc1 [file mmc1.pdf]

## Appendice électronique 1

# Modification de la fonction Specpool du package Vegan (Oksanen et al. 2011) pour les gros jeux de données où il n'est pas possible de faire un tableau croisé au démarrage

```
new_specpool <- function (x, pool)
{
  x <- as.matrix(x)
  if (missing(pool))
    pool <- rep("All", nrow(x))
  if (length(pool) != NROW(x))
    stop("length of 'pool' and number rows in 'x' do not match")
  if (any(nas <- is.na(pool))) {
    pool <- pool[!nas]
    x <- x[!nas, , drop = FALSE]
  }
  out <- seq(1:nrow(x))
  groups <- table(pool)
  inds <- names(groups)
  S <- var.chao <- chao <- var.jack1 <- jack.1 <- jack.2 <- var.boot <- bootS <- rep(NA,
    length(inds))
  names(S) <- names(var.chao) <- names(chao) <- names(var.jack1) <- names(jack.1) <-
names(jack.2) <- names(var.boot) <- names(bootS) <- inds
  for (is in inds) {
    a1 <- a2 <- NA
    gr <- out[pool == is]
    n <- length(gr)
    if (n <= 0)
      next
    X <- table(as.factor(as.vector(x[gr,1])),as.factor(x[gr,2]))
    freq <- colSums(X > 0)
    p <- freq[freq > 0]/n
    S[is] <- sum(freq > 0)
    if (S[is] == 0)
      next
    if (n >= 1)
      a1 <- sum(freq == 1)
    if (n >= 2)
      a2 <- sum(freq == 2)
    else 0
    chao[is] <- S[is] + if (!is.na(a2) && a2 > 0)
      a1 * a1/2/a2
    else 0
    jack.1[is] <- S[is] + a1 * (n - 1)/n
    jack.2[is] <- S[is] + a1 * (2 * n - 3)/n - a2 * (n -
      2)^2/n/(n - 1)
    bootS[is] <- S[is] + sum((1 - p)^n)
    aa <- if (!is.na(a2) && a2 > 0)
      a1/a2
    else 0
  }
}
```

```

var.chao[is] <- a2 * (0.5 + (1 + aa/4) * aa) * aa * aa
if (!is.na(a1) && a1 > 0) {
  jf <- table(rowSums(X[, freq == 1, drop = FALSE] >
    0))
  var.jack1[is] <- (sum(as.numeric(names(jf))^2 * jf) -
    a1/n) * (n - 1)/n
}
pn <- (1 - p)^n
X <- X[, freq > 0, drop = FALSE]
Zp <- (crossprod(X == 0)/n)^n - outer(pn, pn, "**")
var.boot[is] <- sum(pn * (1 - pn)) + 2 * sum(Zp[lower.tri(Zp)])
}
out <- list(Species = S, chao = chao, chao.se = sqrt(var.chao),
  jack1 = jack.1, jack1.se = sqrt(var.jack1), jack2 = jack.2,
  boot = bootS, boot.se = sqrt(var.boot), n = as.vector(groups))
out <- as.data.frame(out)
attr(out, "pool") <- pool
out
}

```
